# Supplementary material for: A Model-Informed Method for the Purpose of Precision Dosing of Isoniazid in Pulmonary Tuberculosis
Source: PubMed Central journal article supplement — Clin Pharmacokinet. 2021 Feb 22;60(7):943–53. doi: 10.1007/s40262-020-00971-2 (PMC8249295; doi:10.1007/s40262-020-00971-2), 2021-02-22
Supplement: 40262_2020_971_MOESM1_ESM.pdf [file 40262_2020_971_MOESM1_ESM.pdf]

## Electronic Supplemental Materials

Title: A Model-Informed Method for the Purpose of Precision Dosing of Isoniazid in Pulmonary Tuberculosis

Journal: Clinical Pharmacokinetics

Authors: Stijn W. van Beek (1), Rob ter Heine (1), Jan-Willem C. Alffenaar (2, 3, 4), Cecile Magis-Escorra (5), Rob E. Aarnoutse (1), Elin M. Svensson (1, 6) on behalf of the Isoniazid Precision Dosing Group

Affiliations: (1) Department of Pharmacy, Radboud Institute for Health Sciences, Radboud University Medical Center, Nijmegen, The Netherlands; (2) University of Sydney, Faculty of Medicine and Health, School of Pharmacy, Sydney, Australia; (3) Westmead hospital, Sydney, Australia; (4) Marie Bashir Institute of Infectious Diseases and Biosecurity, University of Sydney, Sydney, Australia; (5) Department of Respiratory Diseases, Radboud University Medical Center, Nijmegen, The Netherlands; (6) Department of Pharmaceutical Biosciences, Uppsala University, Uppsala, Sweden

Collaborators

Members of the Isoniazid Precision Dosing Group:

M.J. Boeree, E. Burhan, R. Dawson, A.H. Diacon, S. Gillespie, C.M. Mtabho, N.E. Ntingiya, N. Heinrich, W. Hoefsloot, M. Hoelscher, G. Kibiki, K. Reither, I. Sanne, H.H. Semvua, A. Tostmann

Correspondence: [Stijn.vanBeek@radboudumc.nl](mailto:Stijn.vanBeek@radboudumc.nl)

### Captions:

**ESM 1.** Scatterplots of the  $AUC_{24}$  prediction versus the prediction on the full pharmacokinetic curve for the limited sampling strategies using sampling **(a)** at 2, 4 and 6 hours after dosing, **(b)** at 2 and 4 hours after dosing, and **(c)** at 2 hours after dosing.

$AUC_{24}$  area under the concentration time curve from 0 to 24 hours after dosing, *PK* pharmacokinetic

**ESM 2.** Prediction of the  $AUC_{24}$  using the 2 and 4 hour sampling strategy versus  $AUC_{24}$  prediction on the full pharmacokinetic curve for **(a)** the final model without acetyl-isoniazid data, and **(b)** the re-estimated model without mixture component.

$AUC_{24}$  area under the concentration time curve from 0 to 24 hours after dosing, *PK* pharmacokinetic

**ESM 3.** NONMEM control stream of the population pharmacokinetic model of isoniazid and acetyl-isoniazid

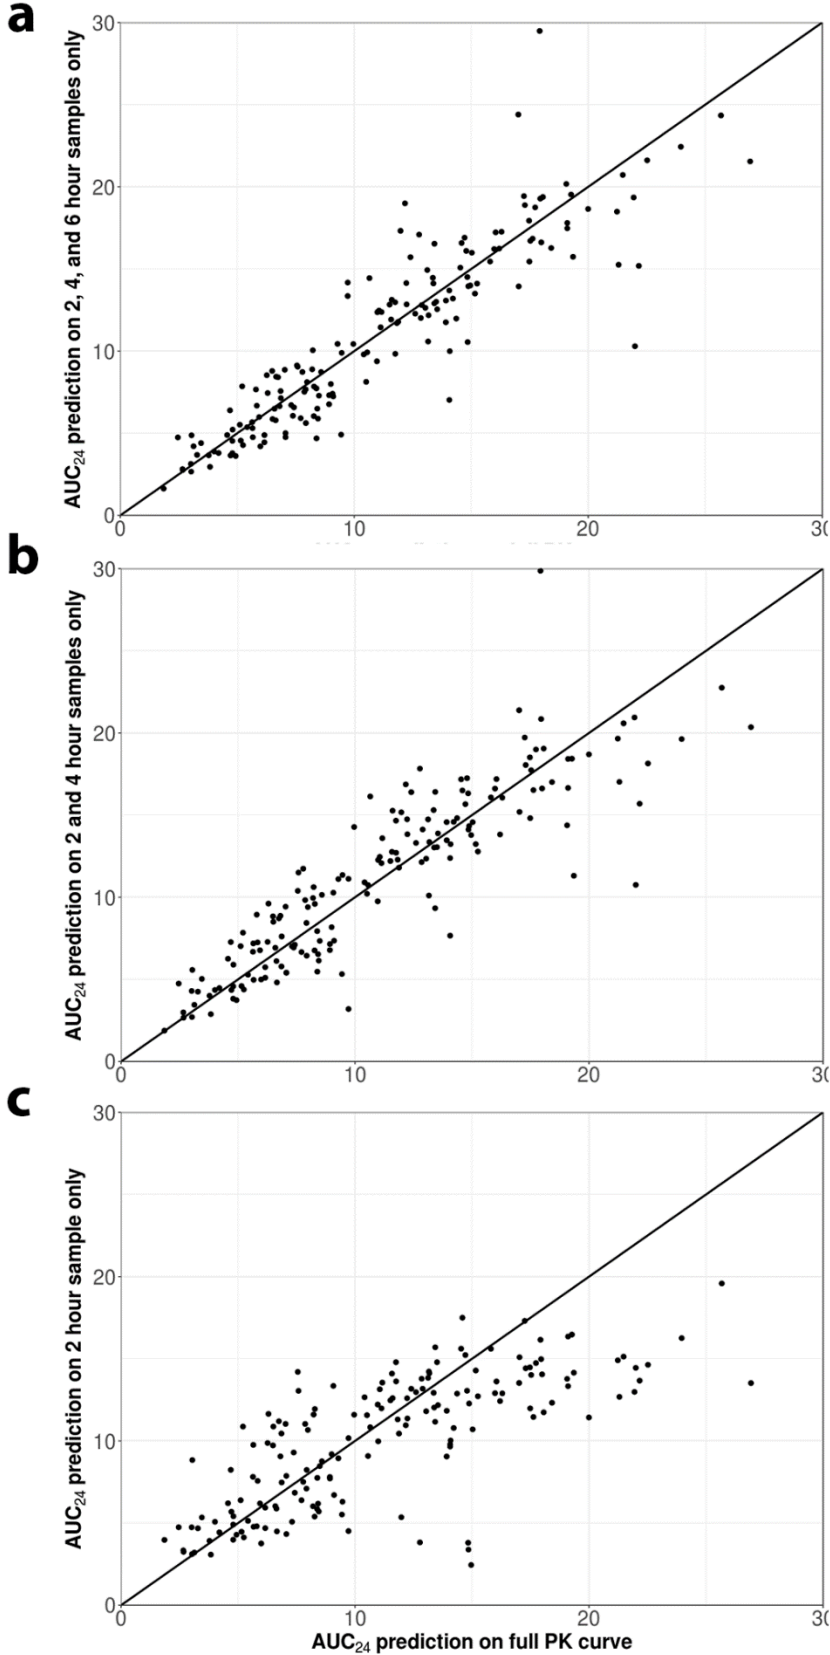

ESM 2

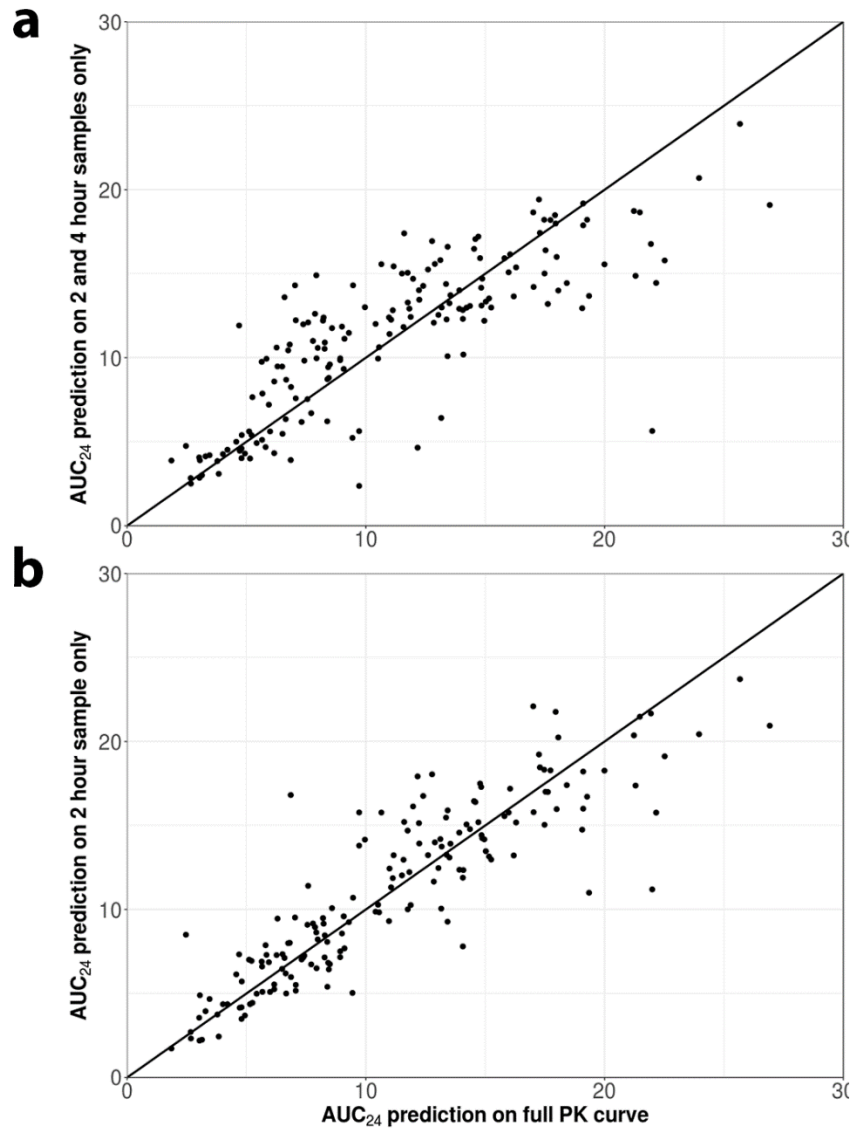

### ESM 3

§SUBROUTINE ADVAN5

§MODEL

COMP=(DOSE,DEFDOSE)  
COMP=(CENTRAL,DEFOBS)  
COMP=(TRANSIT1)  
COMP=(TRANSIT2)  
COMP=(TRANSIT3)  
COMP=(TRANSIT4)  
COMP=(PERIPH)  
COMP=(LIVER)  
COMP=(ACINH)

§MIX

NSPOP=2  
P(1) = THETA(8)  
P(2) = 1-THETA(8)

§PK

FFM2= FFM  
IF(FFM.EQ.-99) FFM2 = 45

FCL = (FFM2/45)\*\*0.75  
FV = (FFM2/45)\*\*1

TVV = THETA(1) \* FV  
TVCLF = THETA(2) \* FCL  
TVCLS = THETA(9) \* FCL  
TVKA = THETA(3)  
TVV2 = THETA(4) \* FV  
TVQ = THETA(5) \* FCL  
TVVM = THETA(6) \* FV  
TVCLM = THETA(7) \* FCL  
TVCLO = THETA(10) \* FCL

V = TVV\*EXP(ETA(1))  
IF(MIXNUM.EQ.1) CL = TVCLF\*EXP(ETA(5))  
IF(MIXNUM.EQ.2) CL = TVCLS\*EXP(ETA(5))  
MIX = MIXNUM  
KA = TVKA\*EXP(ETA(2))  
V2 = TVV2  
Q = TVQ  
VM = TVVM\*EXP(ETA(4))  
CLM = TVCLM\*EXP(ETA(3))  
CLO = TVCLO\*EXP(ETA(6))

VH = 1 \* FV  
QH = 0.55 \* 90 \* FCL  
FU = 0.9

CLINT = CL+CLO  
EH = ( CLINT \* FU ) / ( ( CLINT \* FU ) + QH )  
CLH = EH \* QH

EH\_ACINH = ( CL \* FU ) / ( ( CL \* FU ) + QH )  
CL\_ACINH = EH\_ACINH \* QH

K13 = KA  
K34 = KA  
K45 = KA  
K56 = KA  
K68 = KA  
K27 = Q/V  
K72 = Q/V2  
K82 = (QH\*(1-EH))/VH  
K28 = QH/V  
K89 = CL\_ACINH/VH  
K90 = CLM/VM  
K80 = CLO/VH

\$ERROR

IF(STDY.EQ.1) THEN  
    ALT\_BLQ= 1  
ELSE  
    ALT\_BLQ= 0  
ENDIF

IF(CMT.EQ.2) THEN  
    ERR\_BLQ= ( ALT\_BLQ \* ERR(3) ) + ( ( 1-ALT\_BLQ ) \* ERR(4) )  
    ERRORS= ERR(1)  
    IPRED=A(2)/V  
ELSE  
    ERR\_BLQ= ERR(5)  
    ERRORS= ERR(2)  
    IPRED=A(9)/VM  
ENDIF

IF(BLQ.EQ.0) THEN  
    Y = IPRED + IPRED\*(ERRORS)  
ELSE  
    Y = IPRED + IPRED\*(ERRORS) + ERR\_BLQ  
ENDIF

IRES = DV - IPRED  
IWRES = IRES/IPRED

\$THETA  
(0, 57.5) ;1 V  
(0, 32.7) ;2 CL FAST  
(0, 5.42) ;3 KA  
(0, 18.7) ;4 V2

(0, 2.48) ;5 Q  
(0, 39.2) ;6 VM  
(0, 6.65) ;7 CLM  
(0, 0.434,1) ;8 PROP FAST  
(0, 4.31) ;9 CL SLOW  
(0, 12.1) ;10 CL OTHER

\$OMEGA

0.0697 ;1 IIV V  
0.692 ;2 IIV KA  
0 FIX ;3 IIV F  
0.135 ;4 IIV CLM  
0.0107 ;5 IIV VM  
\$OMEGA BLOCK(2)  
0.331 ;6 IIV CL  
0.0312 0.144 ;7 IIV CLO

\$\$SIGMA BLOCK(2)

0.141 ;1 Proportional error parent  
0.0525 0.0544 ;2 Proportional error metabolite

\$\$SIGMA

0.000002 FIX ;3 additive BLQ error parent analytical method 1  
0.00000008 FIX ;4 additive BLQ error parent analytical method 2  
0.0000002 FIX ;5 additive BLQ error metabolite

\$ESTIMATION METH=1 INTER PRINT=1
